# Supplementary material for: Essential role of hydride ion in ruthenium-based ammonia synthesis catalysts
Source: PubMed Central journal article supplement (PMC6013784; doi:10.1039/c6sc00767h), 2016-04-21
Supplement: SC-007-C6SC00767H-s001.pdf [file SC-007-C6SC00767H-s001.pdf]

Supporting Information for

# Essential Role of Hydride Ion in Ruthenium-based Ammonia Synthesis Catalysts

*Masaaki Kitano,<sup>a</sup> Yasunori Inoue,<sup>b</sup> Hiroki Ishikawa,<sup>b</sup> Kyosuke Yamagata,<sup>b</sup> Takuya Nakao,<sup>b</sup>*

*Tomofumi Tada,<sup>a</sup> Satoru Matsuishi,<sup>a</sup> Toshiharu Yokoyama,<sup>ac</sup> Michikazu Hara,<sup>bcd\*</sup> and Hideo*

*Hosono<sup>abcd\*</sup>*

<sup>a</sup>Materials Research Center for Element Strategy, Tokyo Institute of Technology, 4259 Nagatsuta,

Midori-ku, Yokohama 226-8503, Japan

<sup>b</sup>Laboratory for Materials and Structures, Tokyo Institute of Technology, 4259 Nagatsuta, Midori-ku,

Yokohama 226-8503, Japan.

<sup>c</sup>ACCEL, Japan Science and Technology Agency, 4-1-8 Honcho, Kawaguchi, Saitama, 332-0012,  
Japan.

<sup>d</sup>Frontier Research Center, Tokyo Institute of Technology, 4259 Nagatsuta, Midori-ku, Yokohama

226-8503, Japan.

## Experimental Section

### Materials.

$\text{Ca}_2\text{N}:\text{e}^-$  powder was synthesized by solid-state reaction of  $\text{Ca}_3\text{N}_2$  powder and Ca metal shot.  $\text{Ca}_3\text{N}_2$  powder was first mixed with Ca metal shot at a molar ratio of 1:1 and the mixture was uniaxially pressed into a pellet form under pressure (20–30 MPa). The pellet was covered with molybdenum foil and sealed in an evacuated silica tube. The silica tube was heated at 800°C for 50 h in a vacuum, followed by quenching into water. The obtained sample was then ground into a powder under an Ar atmosphere. As a reference samples,  $\text{Ca}_2\text{NH}$  was synthesized by heating  $\text{Ca}_2\text{N}$  powder at 300°C in a flow of  $\text{N}_2$  and  $\text{H}_2$  ( $\text{N}_2:\text{H}_2 = 1:3$ , flow rate = 60 mL  $\text{min}^{-1}$ , pressure = 0.1 MPa), and  $\text{CaNH}$  was prepared by heating  $\text{Ca}_3\text{N}_2$  at 600°C in a  $\text{N}_2$  and  $\text{H}_2$  gas mixture under the same flow conditions. XRD patterns of the obtained samples were consistent with the standard diffraction patterns (Fig. S8).  $\text{CaH}_2$  was prepared by heating Ca metal at 400°C for 10 h in a  $\text{H}_2$  atmosphere (2.0 MPa).

Ru-loading on  $\text{Ca}_2\text{N}:\text{e}^-$ ,  $\text{Ca}_3\text{N}_2$ , and  $\text{CaNH}$  was conducted by the following procedure. The sample powder and  $\text{Ru}_3(\text{CO})_{12}$  were sealed in an evacuated silica tube and heated under the following temperature program: 2°C  $\text{min}^{-1}$  up to 40°C, hold for 1 h; up to 70°C over 2 h, hold for 1 h; up to 120°C over 2 h, hold for 1 h; and up to 250°C over 2.5 h, hold for 2 h; cooling down to ambient temperature.

### Catalytic reaction.

Ammonia synthesis was conducted in a fixed bed flow system with a synthesis gas ( $\text{H}_2:\text{N}_2 = 3:1$ ) at a flow rate of 60 mL  $\text{min}^{-1}$ . The reaction temperature was varied from 200 to 340°C and the pressure was kept at 0.1 MPa. All kinetic experiments were conducted far from equilibrium conditions (for example, the conversion level was less than 30% of that at equilibrium). The reaction orders with respect to  $\text{N}_2$  and  $\text{H}_2$  were obtained at a constant flow rate (60 mL  $\text{min}^{-1}$ ) using Ar gas as a diluent, and that for  $\text{NH}_3$  was determined with  $(3\text{H}_2+\text{N}_2)$  by changing the synthesis gas flow rate. The produced ammonia was trapped by in a 5 mM sulfuric acid solution and the amount of  $\text{NH}_4^+$  generated in the solution was determined using ion chromatography (LC-2000 plus, Jasco). Ammonia synthesis from  $\text{N}_2$  and  $\text{D}_2$  was conducted using a U-shaped glass reactor connected to a closed gas circulation system. The mixture of  $\text{N}_2$  and  $\text{D}_2$  gases (total pressure: 60 kPa,  $\text{N}_2:\text{D}_2 = 1:3$ ) was introduced into the glass system. The change in the composition of the circulating gas was monitored with a quadrupole mass spectrometer (M-101QA-TDM, Canon Anelva Corp.) and Ar was used as a carrier gas. The circulating pump placed in the system removes diffusional and adsorption/desorption limitations. The  $m/z = 2, 3, 4, 16, 17, 18, 19, 20,$  and 28 masses were monitored as a function of time to follow the reaction.  $\text{ND}_3$  ( $m/z = 20$ ) was hardly detectable because it overlaps with a fragment of Ar ( $m/z = 20$ ). The fragmentation factor of  $m/z = 20, 40$  for Ar is 0.12, 0.88, respectively.

### Characterization.

$\text{N}_2$  adsorption-desorption isotherms were measured at -196°C using a specific surface area analyzer (Nova 4200e, Quantachrome) after evacuation of the sample at 300°C. The Ru dispersion, mean particle size, and the number of surface Ru atoms were determined by CO pulse chemisorption at 50°C with a He flow of 30 mL  $\text{min}^{-1}$  and 0.09 mL pulses of 9.88% CO in He using a catalyst analyzer (BELCAT-A, MicrotracBEL, Japan); a stoichiometry of  $\text{Ru}/\text{CO} = 1$  was assumed. The

crystal structure was identified using XRD (D8 Advance, Bruker) with monochromated Cu K $\alpha$  radiation ( $\lambda = 0.15418$  nm). Raman spectra of the samples were measured with a spectrometer (HR-800, Horiba Jobin Yvon Co. Ltd., Japan) using a laser with a wavelength of 457.4 nm. TPA of H<sub>2</sub> measurements were conducted by heating (1°C min<sup>-1</sup>) a sample (ca. 100 mg) in a stream of 4.8% H<sub>2</sub>/Ar mixture, and the consumption of H<sub>2</sub> was monitored with a thermal conductivity detector (TCD) and mass spectrometer (BELMass, MicrotracBEL, Japan). TPD of H<sub>2</sub> was performed using the same instrument as TPA experiment. Prior to the TPD measurements, the sample was heated under a mixture of H<sub>2</sub> and N<sub>2</sub>, H<sub>2</sub>:N<sub>2</sub> = 3:1, 60 mL min<sup>-1</sup>, 0.1 MPa, 340°C, 10 h, which are the same reaction conditions as those used for ammonia synthesis. After cooling to room temperature, the sample was placed into a TPD glass reactor in an Ar-filled glovebox. The sample was then heated (1°C min<sup>-1</sup>) in an Ar stream (30 mL min<sup>-1</sup>), and the concentration of H<sub>2</sub> was monitored with a thermal conductivity detector (TCD) and a mass spectrometer (BELMass, MicrotracBEL, Japan).

## Supplementary Results

**Table S1** Orders of reaction for ammonia synthesis over various Ru catalysts.

| Catalyst                 | $\alpha(\text{N}_2)$ | $\beta(\text{H}_2)$ | $\gamma(\text{NH}_3)$ |
|--------------------------|----------------------|---------------------|-----------------------|
| Ru/Ca <sub>2</sub> N     | 0.53                 | 0.79                | -1.03                 |
| Ru/CaNH                  | 0.77                 | -0.19               | -0.72                 |
| Ru/CaH <sub>2</sub>      | 0.55                 | 0.87                | -1.11                 |
| Ru/C12A7:e <sup>-</sup>  | 0.46                 | 0.97                | -1.00                 |
| Ru/C12A7:O <sup>2-</sup> | 1.00                 | 0                   | -0.25                 |
| Ru-Cs/MgO                | 1.0                  | -0.45               | -0.37                 |

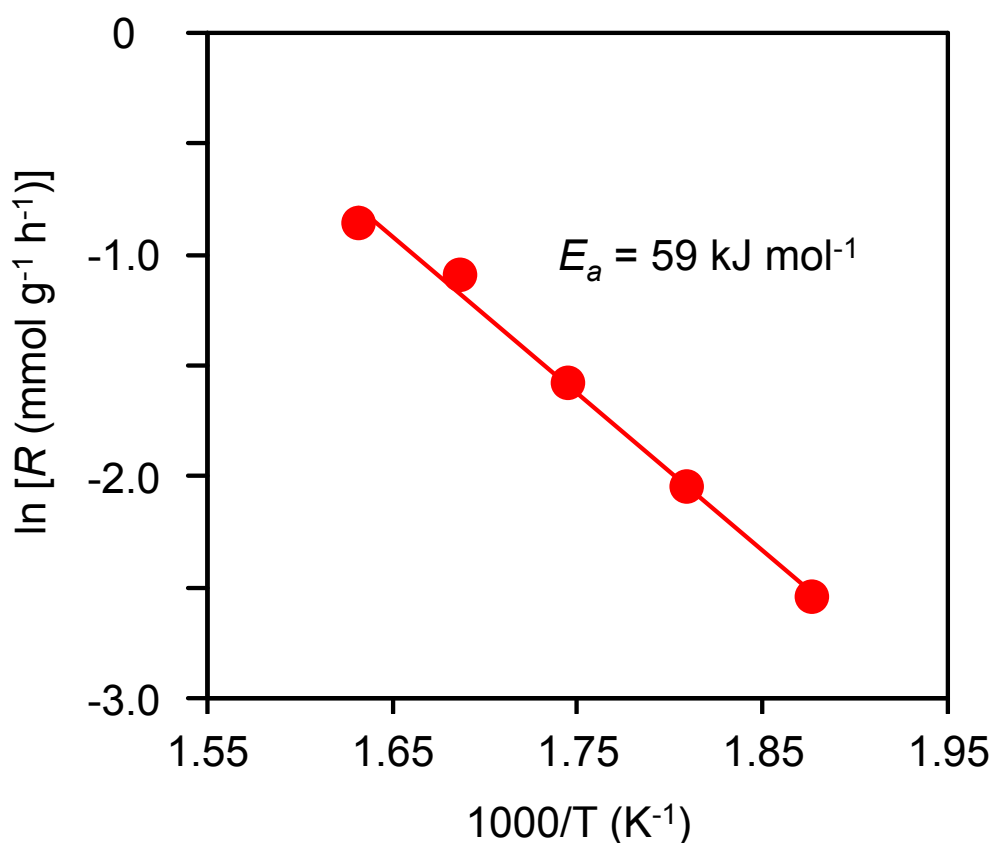

**Figure S1** Temperature dependence of the rate ( $R$ ) of  $\text{N}_2$  isotopic exchange reaction over  $\text{Ru/Ca}_2\text{N:e}^-$  at 26.7 kPa ( $^{15}\text{N}_2 : ^{14}\text{N}_2 = 1 : 4$ ).  $E_a$  is the apparent activation energy calculated from Arrhenius plots of the reaction rate in the temperature range of 260-340°C. Before the reaction,  $\text{Ru/Ca}_2\text{N:e}^-$  was pretreated under  $\text{N}_2$  and  $\text{H}_2$  flow ( $\text{N}_2 : \text{H}_2 = 1:3$ ) at 340°C for 24 h.

The activation energy ( $59 \text{ kJ mol}^{-1}$ ) of  $\text{Ru/Ca}_2\text{N:e}^-$  is much smaller than that of conventional Ru catalysts ( $>130 \text{ kJ mol}^{-1}$ ) reported in the previous literature [S1] and is comparable to that of  $\text{Ru/C12A7:e}^-$  ( $58 \text{ kJ mol}^{-1}$ ).

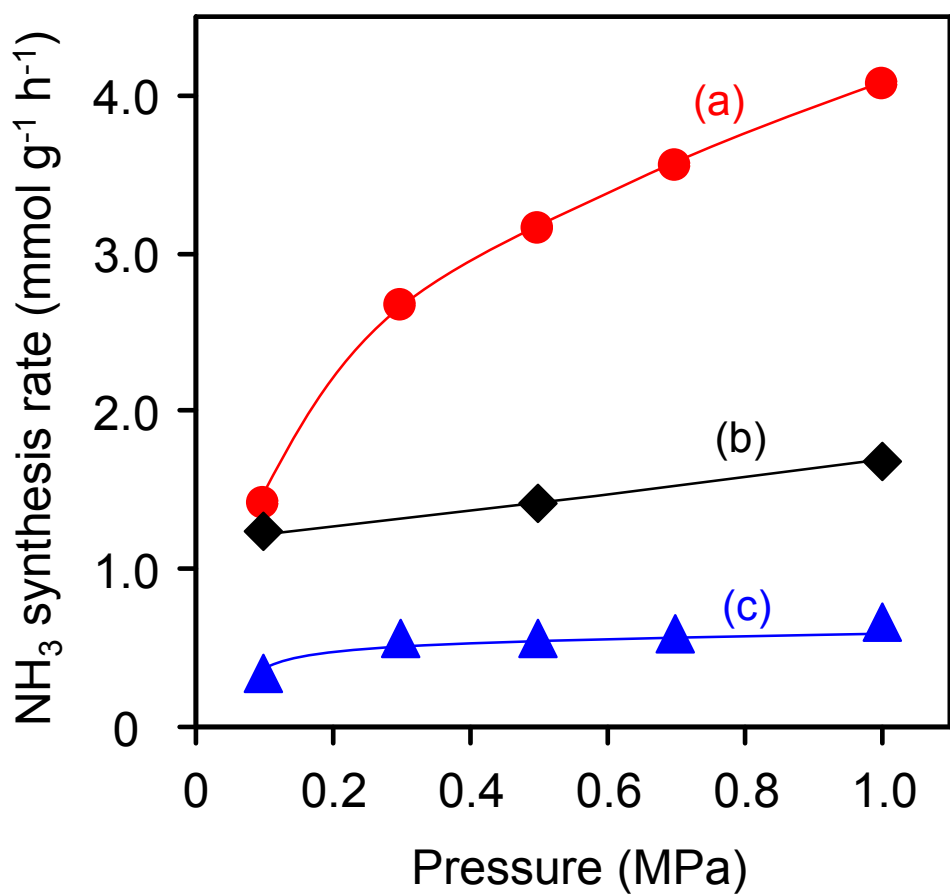

**Figure S2** Pressure dependence of the rate of ammonia synthesis over (a) Ru/Ca<sub>2</sub>N:e<sup>-</sup>, (b) Ru/C12A7:e<sup>-</sup>, (c) Ru/CaNH. (Reaction conditions: catalyst, 0.1 g; WHSV, 36000 mL g<sub>cat</sub><sup>-1</sup> h<sup>-1</sup>; reaction temperature, 320°C).

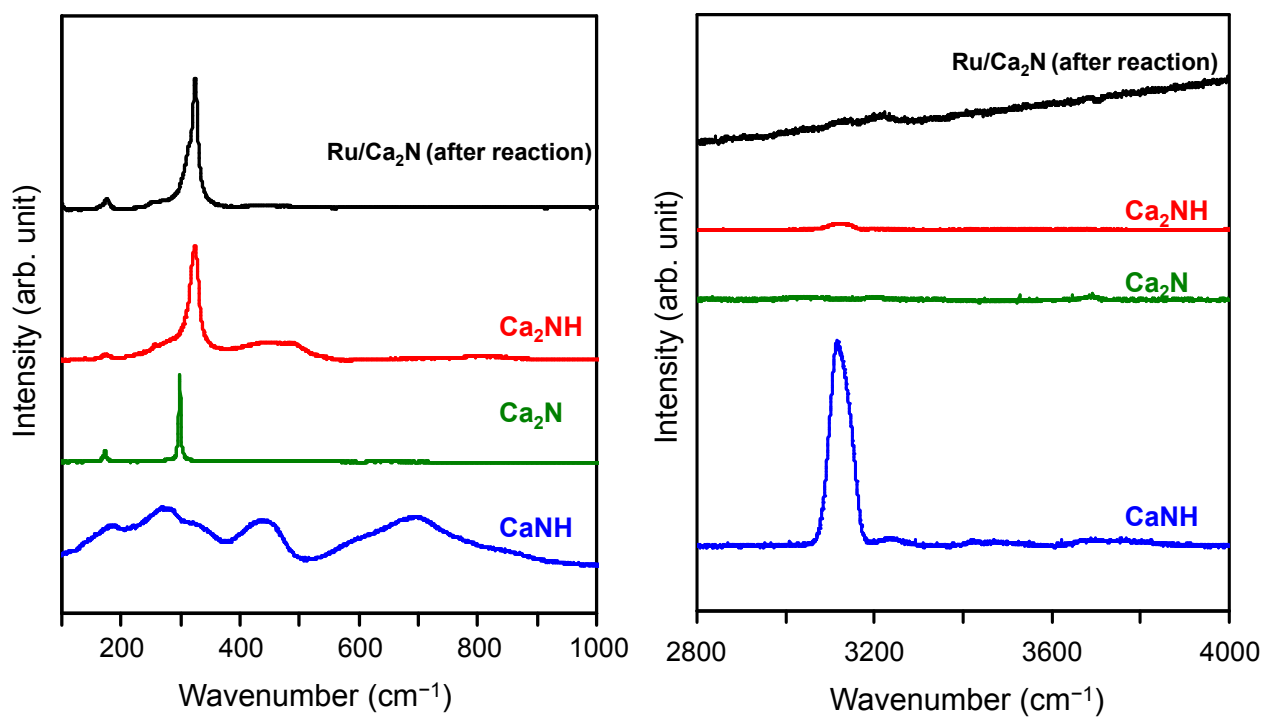

**Figure S3** Raman spectra of Ru/Ca<sub>2</sub>N:e<sup>-</sup> after ammonia synthesis reaction at 340°C for 20 h together with the spectra of CaNH, Ca<sub>2</sub>N, and Ca<sub>2</sub>NH.

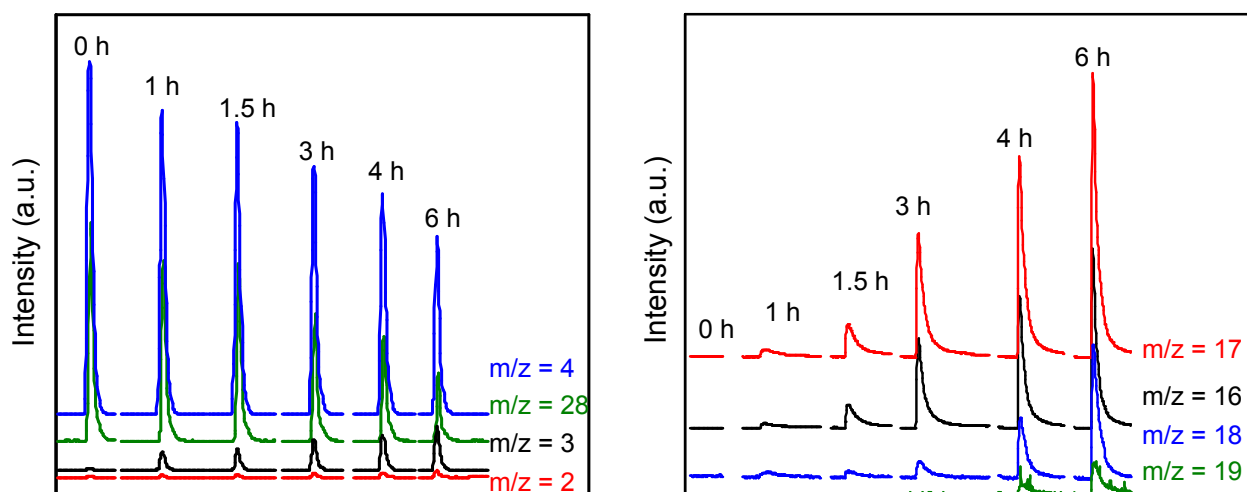

**Figure S4** Mass spectra for ammonia synthesis over Ru/Ca<sub>2</sub>N:e<sup>-</sup>. Reaction conditions: catalyst, 0.2 g; reaction temperature, 340°C; reaction gas, N<sub>2</sub>:D<sub>2</sub> = 1:3; reaction pressure, 60 kPa.



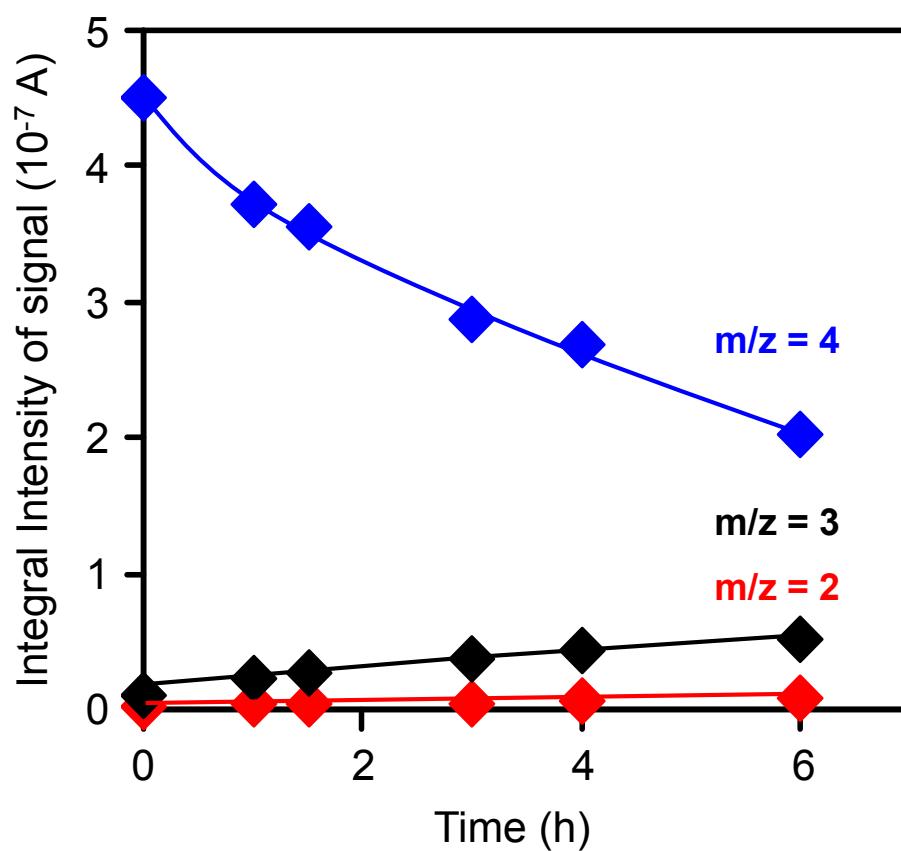

**Figure S5** Reaction time profiles of  $H_2$  ( $m/z = 2$ ),  $D_2$  ( $m/z = 4$ ) and  $HD$  ( $m/z = 3$ ) during ammonia synthesis from  $N_2$  and  $D_2$  over  $Ru/Ca_2N:e^-$ . Before the reaction,  $Ru/Ca_2N:e^-$  was heated under  $N_2+H_2$  flow ( $N_2:H_2 = 1:3$ ) at  $340^\circ C$  for 10 h. Then, the obtained catalyst was heated under  $N_2 + D_2$  atmosphere. (Reaction conditions: catalyst, 0.2 g; reaction temperature,  $340^\circ C$ ; reaction gas,  $N_2:D_2 = 1:3$ ; reaction pressure, 60 kPa).

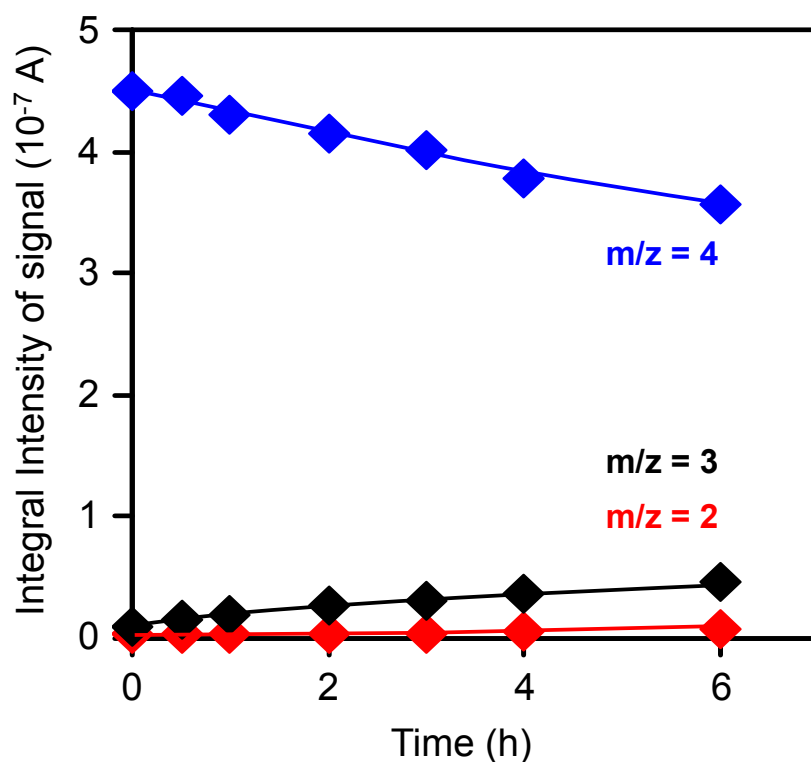

**Figure S6** Reaction time profiles of hydrogen exchange over Ru/Ca<sub>2</sub>N:e<sup>-</sup>. Before the reaction, Ru/Ca<sub>2</sub>N:e<sup>-</sup> was heated under N<sub>2</sub>+H<sub>2</sub> flow (N<sub>2</sub>:H<sub>2</sub> = 1:3) at 340°C for 10 h. Then, the obtained catalyst was heated under D<sub>2</sub> atmosphere without N<sub>2</sub>, where the partial pressure of D<sub>2</sub> was adjusted to the same value as the case of N<sub>2</sub> + D<sub>2</sub> system (Fig. 4b) by adding Ar gas. (Reaction conditions: catalyst, 0.2 g; reaction temperature, 340°C; reaction gas, Ar:D<sub>2</sub> = 1:3; reaction pressure, 60 kPa).

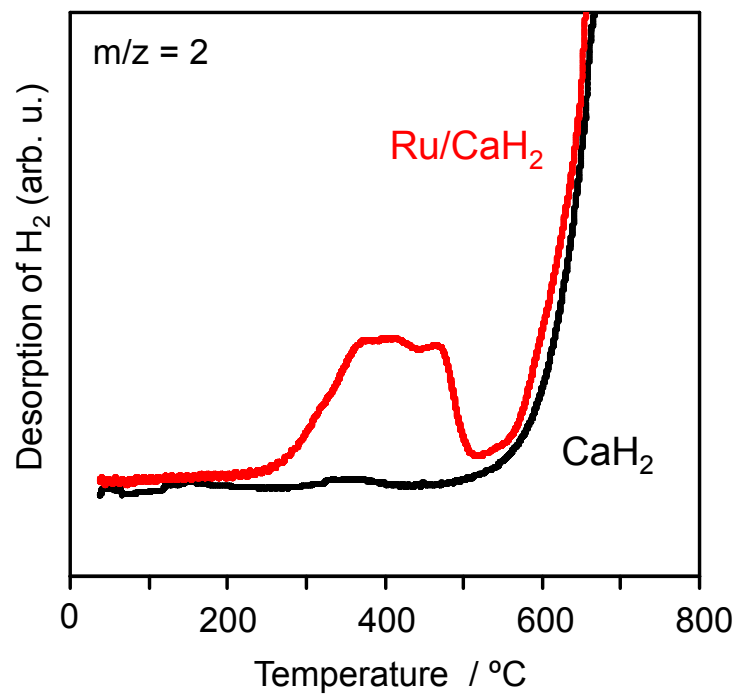

**Figure S7** H<sub>2</sub> TPD profiles of Ru/CaH<sub>2</sub> and CaH<sub>2</sub>. The TPD experiment was performed (1°C min<sup>-1</sup>) under Ar flow.

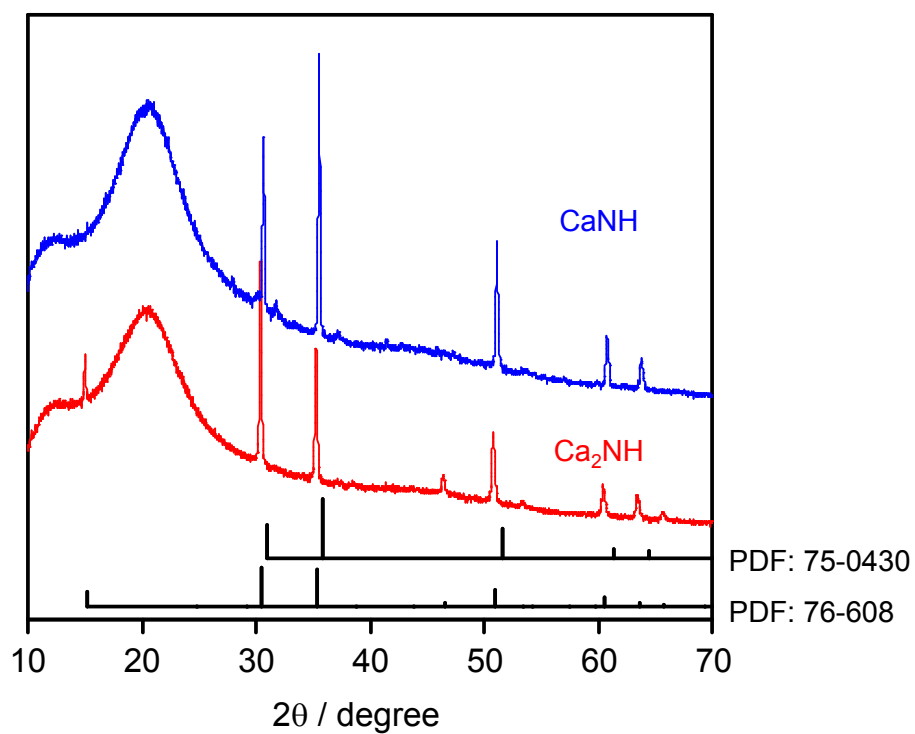

**Figure S8** X-ray diffraction patterns of Ca<sub>2</sub>NH and CaNH. Standard JCPDS diffraction patterns for CaNH (PDF: 75-0430) and Ca<sub>2</sub>NH (PDF: 76-608) are provided for reference.

## Detail conditions for DFT calculations

**Table S2** Computational conditions for DFT calculations.

| <i>Compound</i>                         | <i>Unit Cell</i>                                            | <i>Space Group</i>       | <i>Surface index</i> | <i>Kpoints</i> | <i>E<sup>cut</sup></i> | <i>Vaccum width</i> |
|-----------------------------------------|-------------------------------------------------------------|--------------------------|----------------------|----------------|------------------------|---------------------|
| Ca <sub>2</sub> N:e-                    | 18(Ca <sub>2</sub> N)                                       | <i>R</i> $\bar{3}m$      | (111)                | 7×7×1          | 520                    | 20                  |
| Ca <sub>2</sub> N:e-                    | 18(Ca <sub>2</sub> N)                                       | <i>R</i> $\bar{3}m$      | (112)                | 14×2×1         | 520                    | 20                  |
| Ca <sub>2</sub> NH                      | 32(Ca <sub>2</sub> NH)                                      | <i>Fd</i> $\bar{3}m$     | (100)                | 3×3×1          | 470                    | 20                  |
| Ca <sub>2</sub> NH <sub>1-1/16</sub>    | 32(Ca <sub>2</sub> NH <sub>1-1/16</sub> )                   | <i>Fd</i> $\bar{3}m$     | (100)                | 3×3×1          | 470                    | 20                  |
| Ca <sub>2</sub> NH <sub>1-2/16</sub>    | 32(Ca <sub>2</sub> NH <sub>1-2/16</sub> )                   | <i>Fd</i> $\bar{3}m$     | (100)                | 3×3×1          | 470                    | 20                  |
| CaH <sub>2</sub>                        | 24(CaH <sub>2</sub> )                                       | <i>Pnma</i>              | (010)                | 2×4×1          | 500                    | 20                  |
| CaH <sub>2</sub>                        | 24(CaH <sub>2-1/12</sub> )                                  | <i>Pnma</i>              | (010)                | 2×4×1          | 500                    | 20                  |
| CaNH                                    | 12(CaNH)                                                    | <i>Fm</i> $\bar{3}m$     | (100)                | 5×5×1          | 500                    | —                   |
| Ru                                      | 12Ru                                                        | <i>P</i> $\bar{6}_3/mmc$ | (0001)               | 8×8×1          | 550                    | 25                  |
| Ru/Ca <sub>2</sub> NH                   | Ru <sub>6</sub> /16(Ca <sub>2</sub> NH)                     | <i>P</i> $\bar{6}_3/mmc$ | (100)                | 3×3×1          | 470                    | 20                  |
| Ru/Ca <sub>2</sub> NH <sub>1-n/16</sub> | Ru <sub>6</sub> /16(Ca <sub>2</sub> NH <sub>1-n/16</sub> )  | <i>P</i> $\bar{6}_3/mmc$ | (100)                | 3×3×1          | 470                    | 20                  |
| Ru/Ca <sub>2</sub> NH <sub>1-n/16</sub> | Ru <sub>10</sub> /16(Ca <sub>2</sub> NH <sub>1-n/16</sub> ) | <i>P</i> $\bar{6}_3/mmc$ | (100)                | 3×3×1          | 470                    | 20                  |

Vienna ab initio simulation package (VASP) [S2,S3] was adopted for structural relaxation and calculations for total energies and work functions. The projector-augmented wave (PAW) [S4,S5] method was used, and the electron exchange-correlation was described in Perdew-Burke- Ernzerhof type [S6] generalized gradient approximation. *E<sup>cut</sup>* means cutoff energies for wave functions. Monkhorst-Pack k-point grids [S7] for the first Brillouin zone sampling are listed in *Kpoints* column. Note that the space groups correspond to those in the bulk condition, and that the normal vector of each surface is defined as the c-vector in *Kpoints* column. The convergence criteria of energy and force are respectively  $1.0 \times 10^{-6}$  eV and  $1.0 \times 10^{-2}$  eV/Å.

**Table S3** Computational models for Ru-loaded Ca<sub>2</sub>NH with/without H-vacancies and N<sub>2</sub> molecule, and calculated formation energies of H-vacancies with respect to the stoichiometric Ru-loaded Ca<sub>2</sub>NH.  $\Delta E(V_H)$  of compound AH<sub>1-x</sub> is the total energy difference defined as  $[E(AH_{1-x}) + xE(H_2)/2] - E(AH)$ , where  $E(AH)$ ,  $E(AH_{1-x})$ , and  $E(H_2)$  are respectively the total energies of the stoichiometric AH, H-deficient AH<sub>1-x</sub>, and hydrogen molecule.

| Model index | Unit Cell                                                                   | $\Delta E(V_H)$ in eV |
|-------------|-----------------------------------------------------------------------------|-----------------------|
| 1           | Ru <sub>6</sub> /16(Ca <sub>2</sub> NH)                                     | —                     |
| 2           | Ru <sub>6</sub> /16(Ca <sub>2</sub> NH <sub>1-1/16</sub> )                  | 0.673                 |
| 3           | Ru <sub>6</sub> /N <sub>2</sub> /16(Ca <sub>2</sub> NH)                     | —                     |
| 4           | Ru <sub>6</sub> /N <sub>2</sub> /16(Ca <sub>2</sub> NH <sub>1-1/16</sub> )  | 0.869                 |
| 5           | Ru <sub>6</sub> /N <sub>2</sub> /16(Ca <sub>2</sub> NH <sub>1-1/16</sub> )  | 0.493                 |
| 6           | Ru <sub>6</sub> /N <sub>2</sub> /16(Ca <sub>2</sub> NH <sub>1-1/16</sub> )  | 0.910                 |
| 7           | Ru <sub>6</sub> /N <sub>2</sub> /16(Ca <sub>2</sub> NH <sub>1-1/16</sub> )  | 0.668                 |
| 8           | Ru <sub>10</sub> /16(Ca <sub>2</sub> NH)                                    | —                     |
| 9           | Ru <sub>10</sub> /16(Ca <sub>2</sub> NH <sub>1-1/16</sub> )                 | 0.431                 |
| 10          | Ru <sub>10</sub> /N <sub>2</sub> /16(Ca <sub>2</sub> NH <sub>1-1/16</sub> ) | 0.663                 |

## Model 1

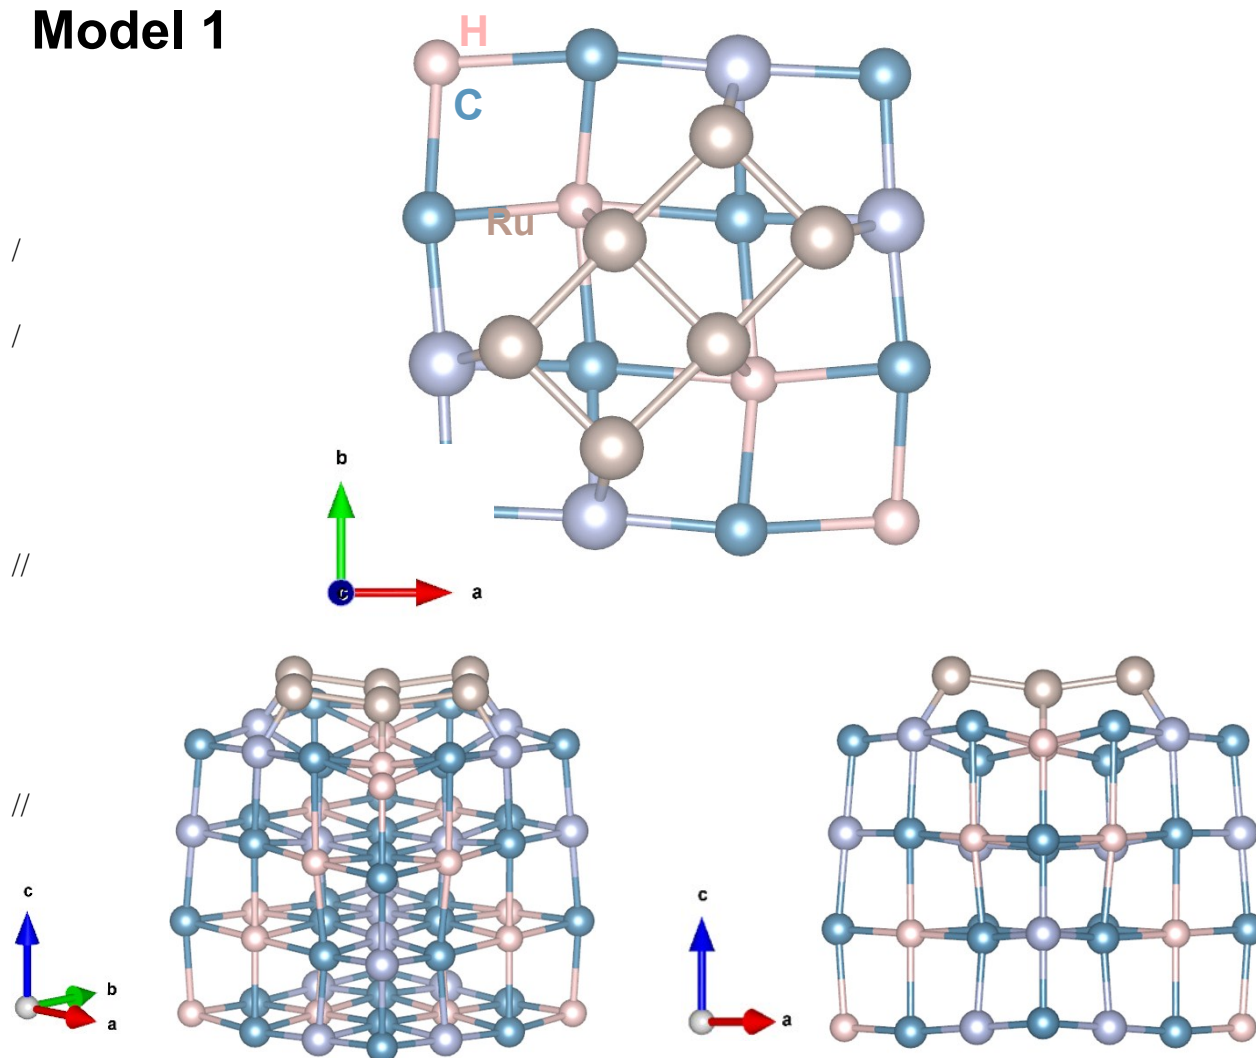

**Figure S9** Computational models for Ru<sub>6</sub>-loaded Ca<sub>2</sub>NH(100), Model 1 in Supplementary Table 4; top view (top) and side views (bottom two). The Ru<sub>6</sub> cluster and the topmost layer of Ca<sub>2</sub>NH(100) are depicted in the top view. Hydrogen atom indicated with dotted circles in the top view is the surface hydrogen removed in Ru-loaded Ca<sub>2</sub>NH<sub>1-x</sub> (100). Note the normal vector the surface is defined as the c-vector in the drawing. Visualization of the models was performed with VESTA [S8].

///

## Model 2

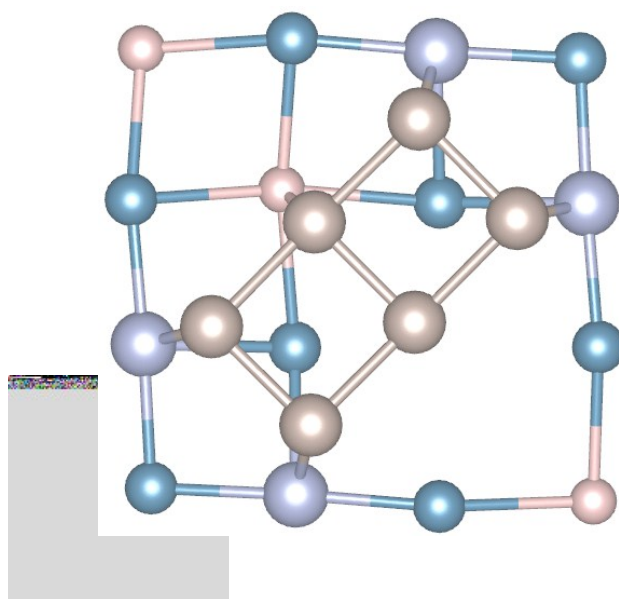

/

/

//

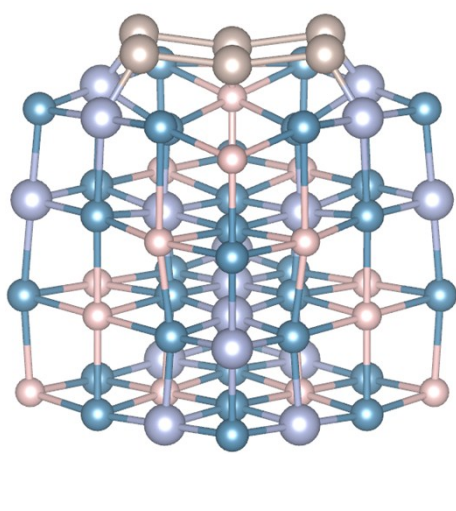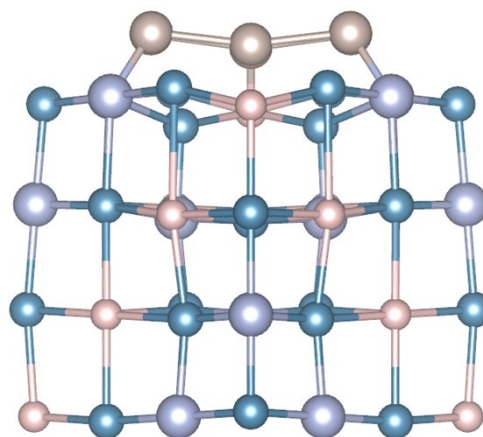

**Figure S10** Computational models for Ru<sub>6</sub>-loaded Ca<sub>2</sub>NH<sub>1-x</sub>(100), Model 2 in Supplementary Table 4; top view (top) and side views (bottom two). The Ru<sub>6</sub> cluster and the topmost layer of Ca<sub>2</sub>NH<sub>1-x</sub>(100) are depicted in the top view. Note the normal vector the surface is defined as the c-vector in the drawing.



//

## Model 4

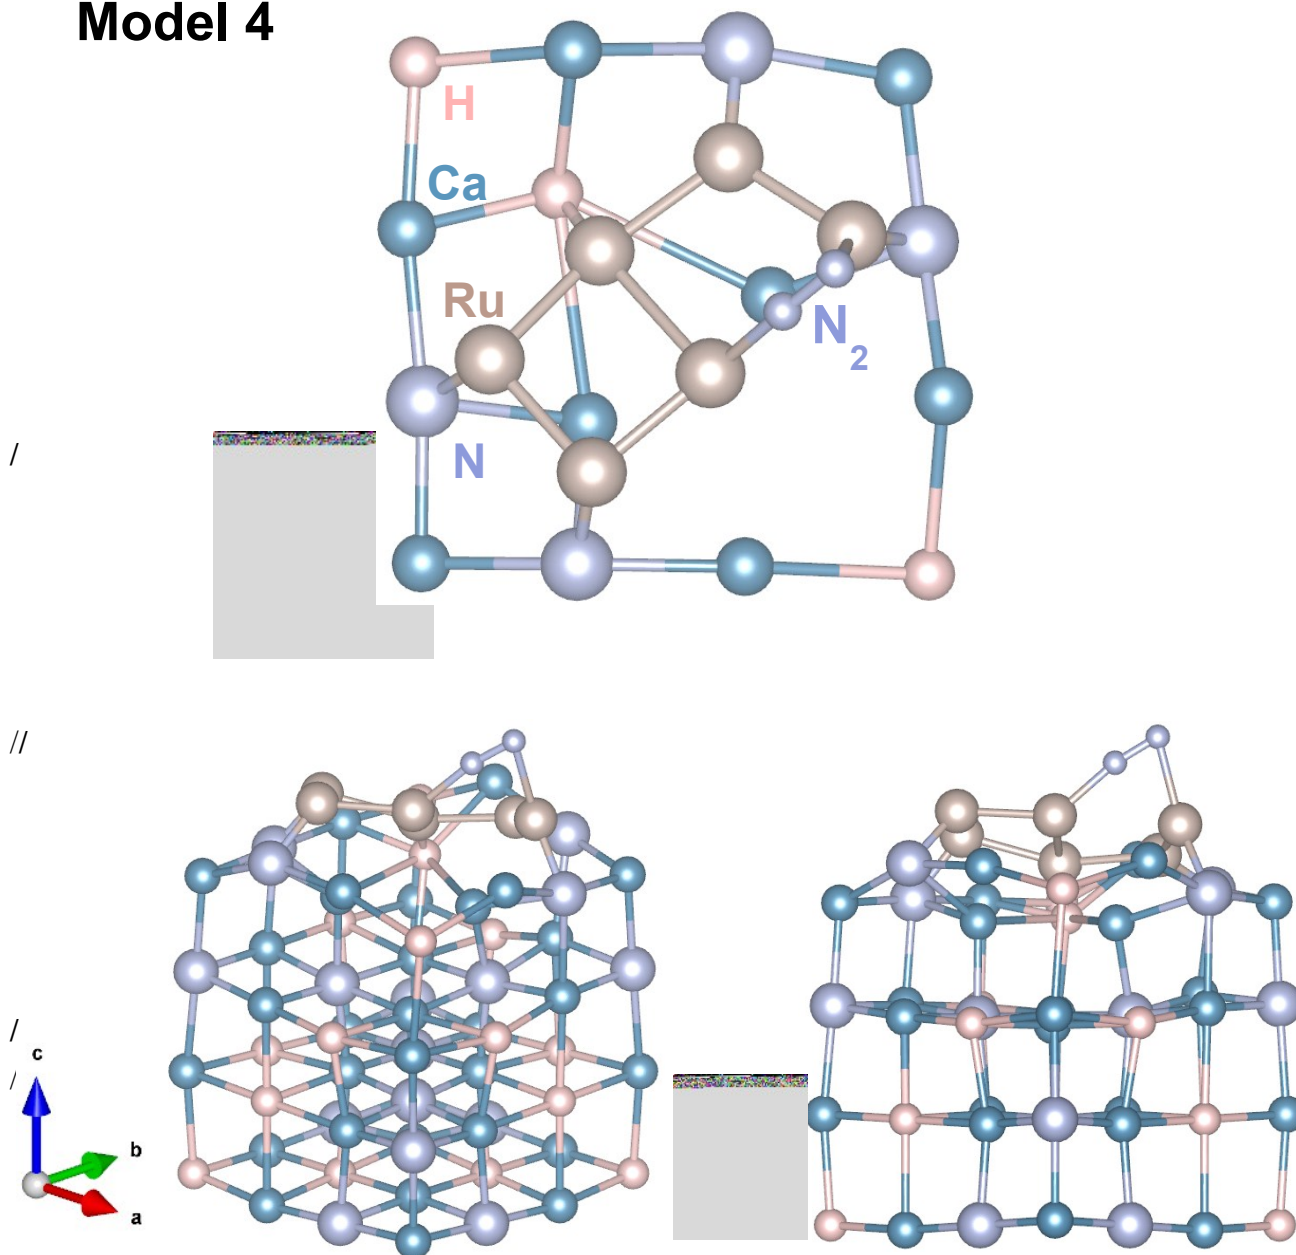

**Figure S11** Computational models for Ru<sub>6</sub>-loaded N<sub>2</sub>-adsorbed Ca<sub>2</sub>NH<sub>1-x</sub>(100), Model 4 in Supplementary Table 4; top view (top) and side views (bottom two). The Ru<sub>6</sub> cluster, adsorbed N<sub>2</sub> molecule, and the topmost layer of Ca<sub>2</sub>NH<sub>1-x</sub> (100) are depicted in the top view. Note the normal vector the surface is defined as the c-vector in the drawing.

/  
/  
**Model 5**

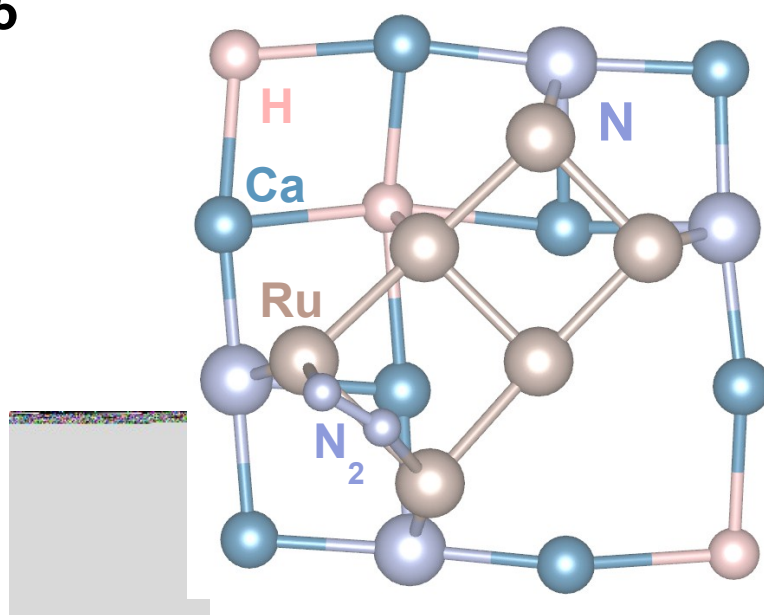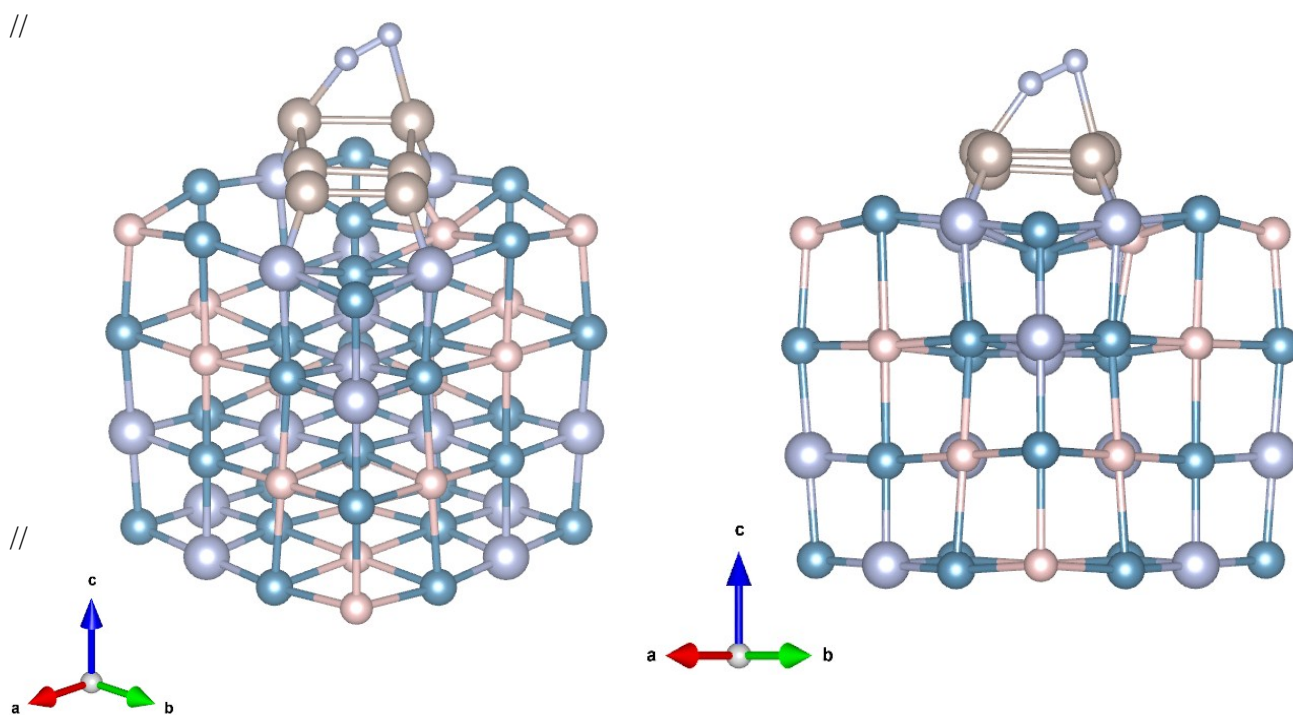

//

**Figure S12** Computational models for Ru<sub>6</sub>-loaded and N<sub>2</sub>-adsorbed Ca<sub>2</sub>NH<sub>1-x</sub>(100), Model 5 in Supplementary Table 5; top view (top) and side views (bottom two). The Ru<sub>6</sub> cluster, adsorbed N<sub>2</sub> molecule, and the topmost layer of Ca<sub>2</sub>NH<sub>1-x</sub> (100) are depicted in the top view. Note the normal vector the surface is defined as the c-vector in the drawing.

/  
/ **Model 6**

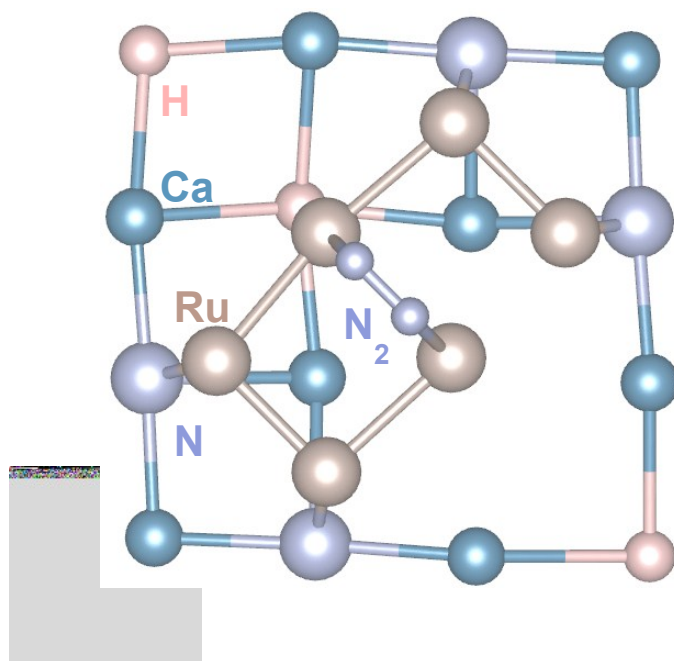

//

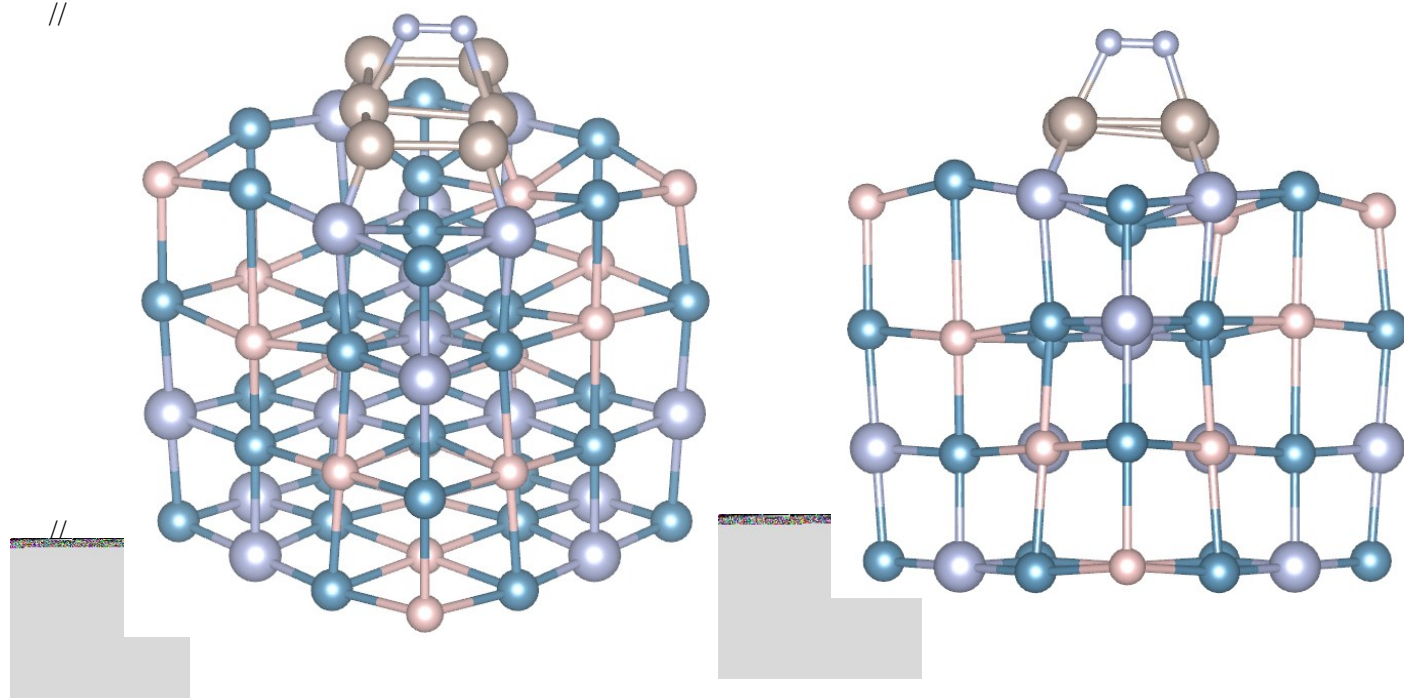

**Figure S13** Computational models for Ru<sub>6</sub>-loaded and N<sub>2</sub>-adsorbed Ca<sub>2</sub>NH<sub>1-x</sub>(100), Model 6 in Supplementary Table 4; top view (top) and side views (bottom two). The Ru<sub>6</sub> cluster, adsorbed N<sub>2</sub> molecule, and the topmost layer of Ca<sub>2</sub>NH<sub>1-x</sub> (100) are depicted in the top view. Note the normal vector the surface is defined as the c-vector in the drawing.

/ **Model 7**

/

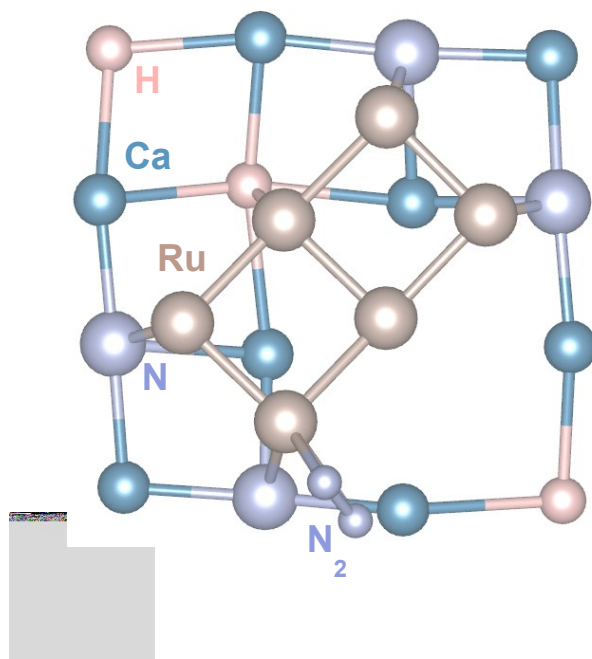

/

/

/

//

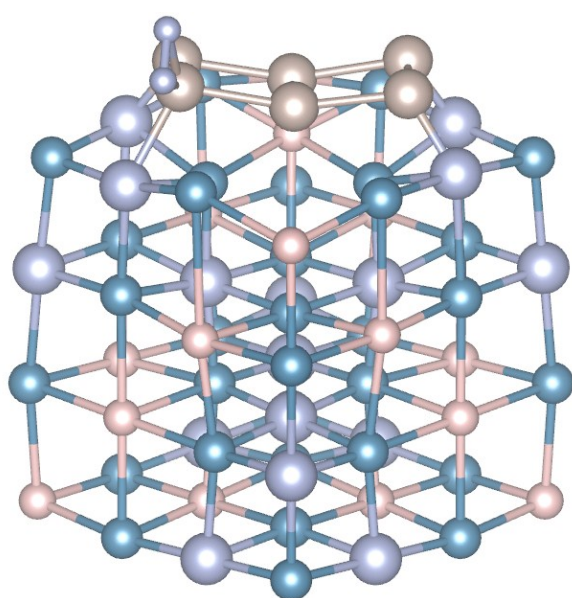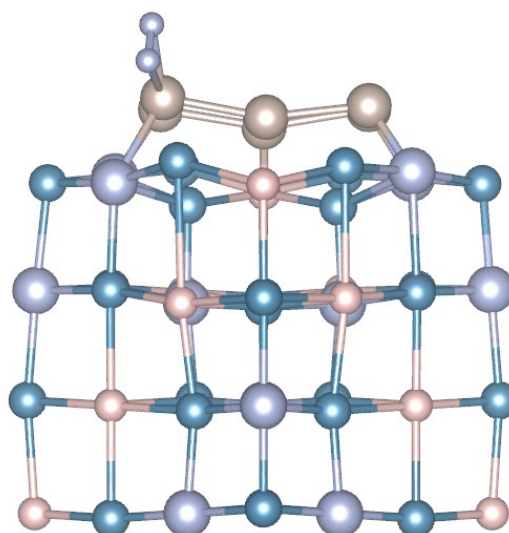

**Figure S14** Computational models for Ru<sub>6</sub>-loaded and N<sub>2</sub>-adsorbed Ca<sub>2</sub>NH<sub>1-x</sub>(100), Model 7 in Supplementary Table 4; top view (top) and side views (bottom two). The Ru<sub>6</sub> cluster, adsorbed N<sub>2</sub> molecule, and the topmost layer of Ca<sub>2</sub>NH<sub>1-x</sub> (100) are depicted in the top view. Note the normal vector the surface is defined as the c-vector in the drawing.

/// **Model 9**

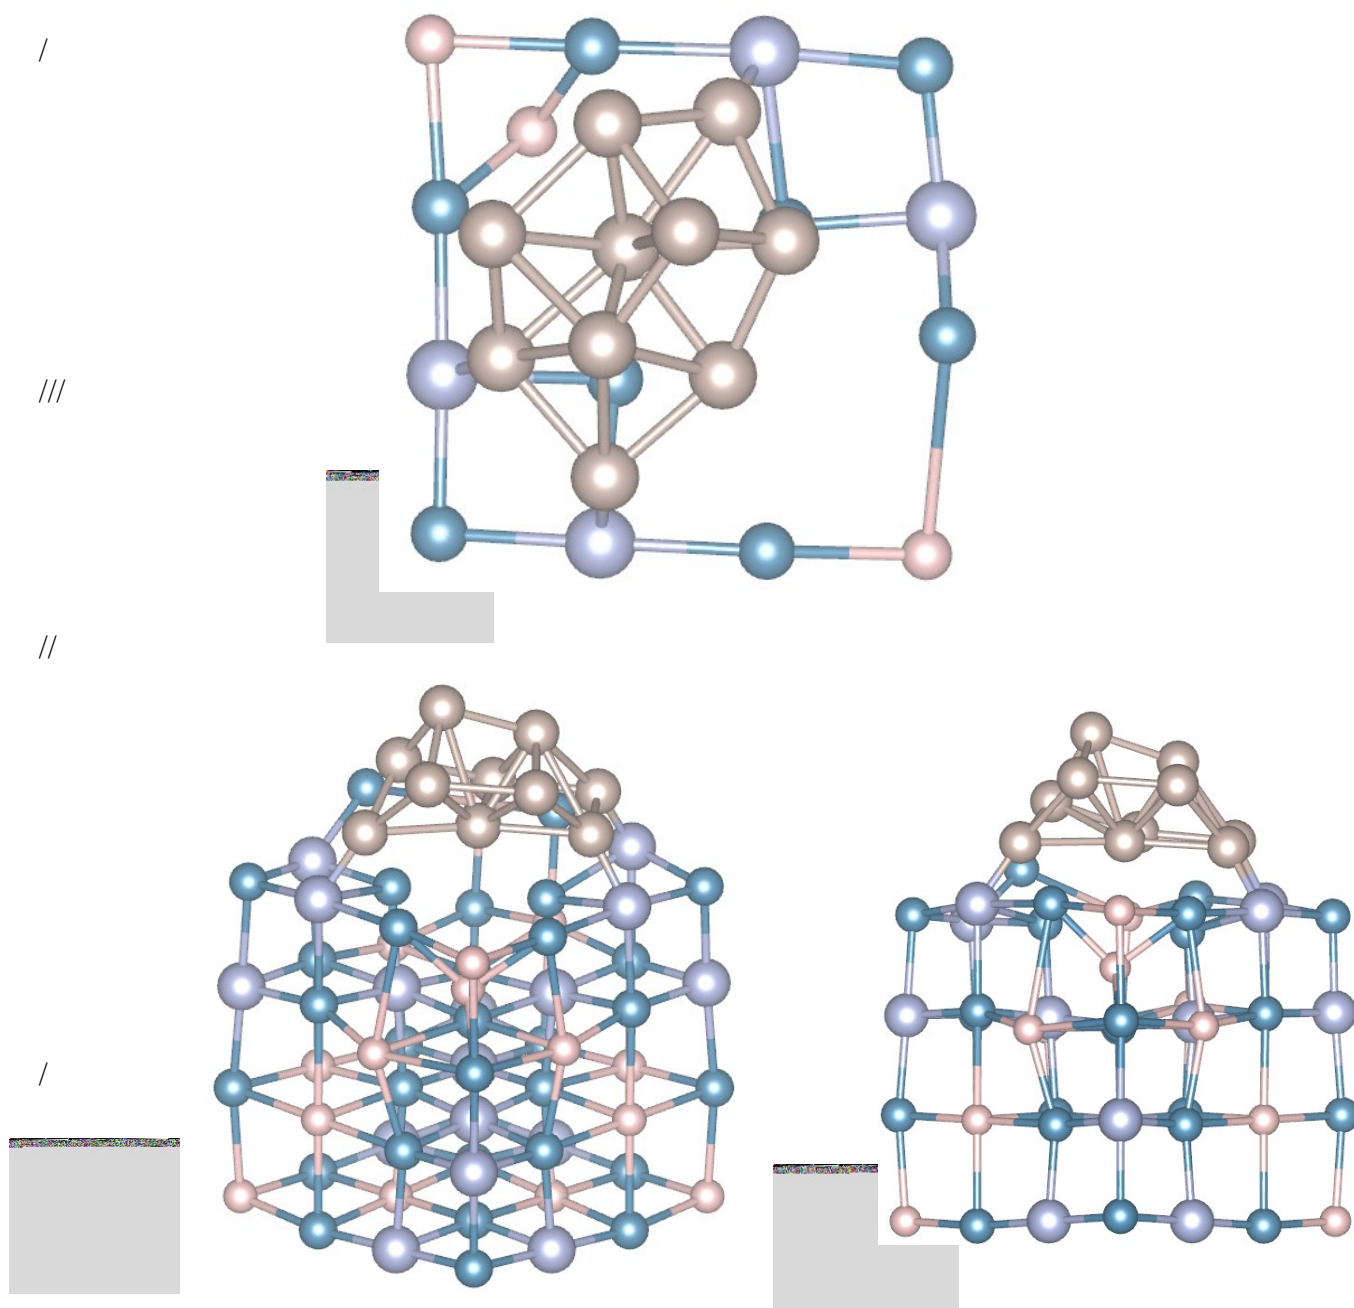

**Figure S15** Computational models for Ru<sub>10</sub>-loaded and N<sub>2</sub>-adsorbed Ca<sub>2</sub>NH<sub>1-x</sub>(100), Model 9 in Supplementary Table 4; top view (top) and side views (bottom two). The Ru<sub>10</sub> cluster, adsorbed N<sub>2</sub> molecule, and the topmost layer of Ca<sub>2</sub>NH<sub>1-x</sub> (100) are depicted in the top view. Note the normal vector the surface is defined as the c-vector in the drawing.

// **Model 10**

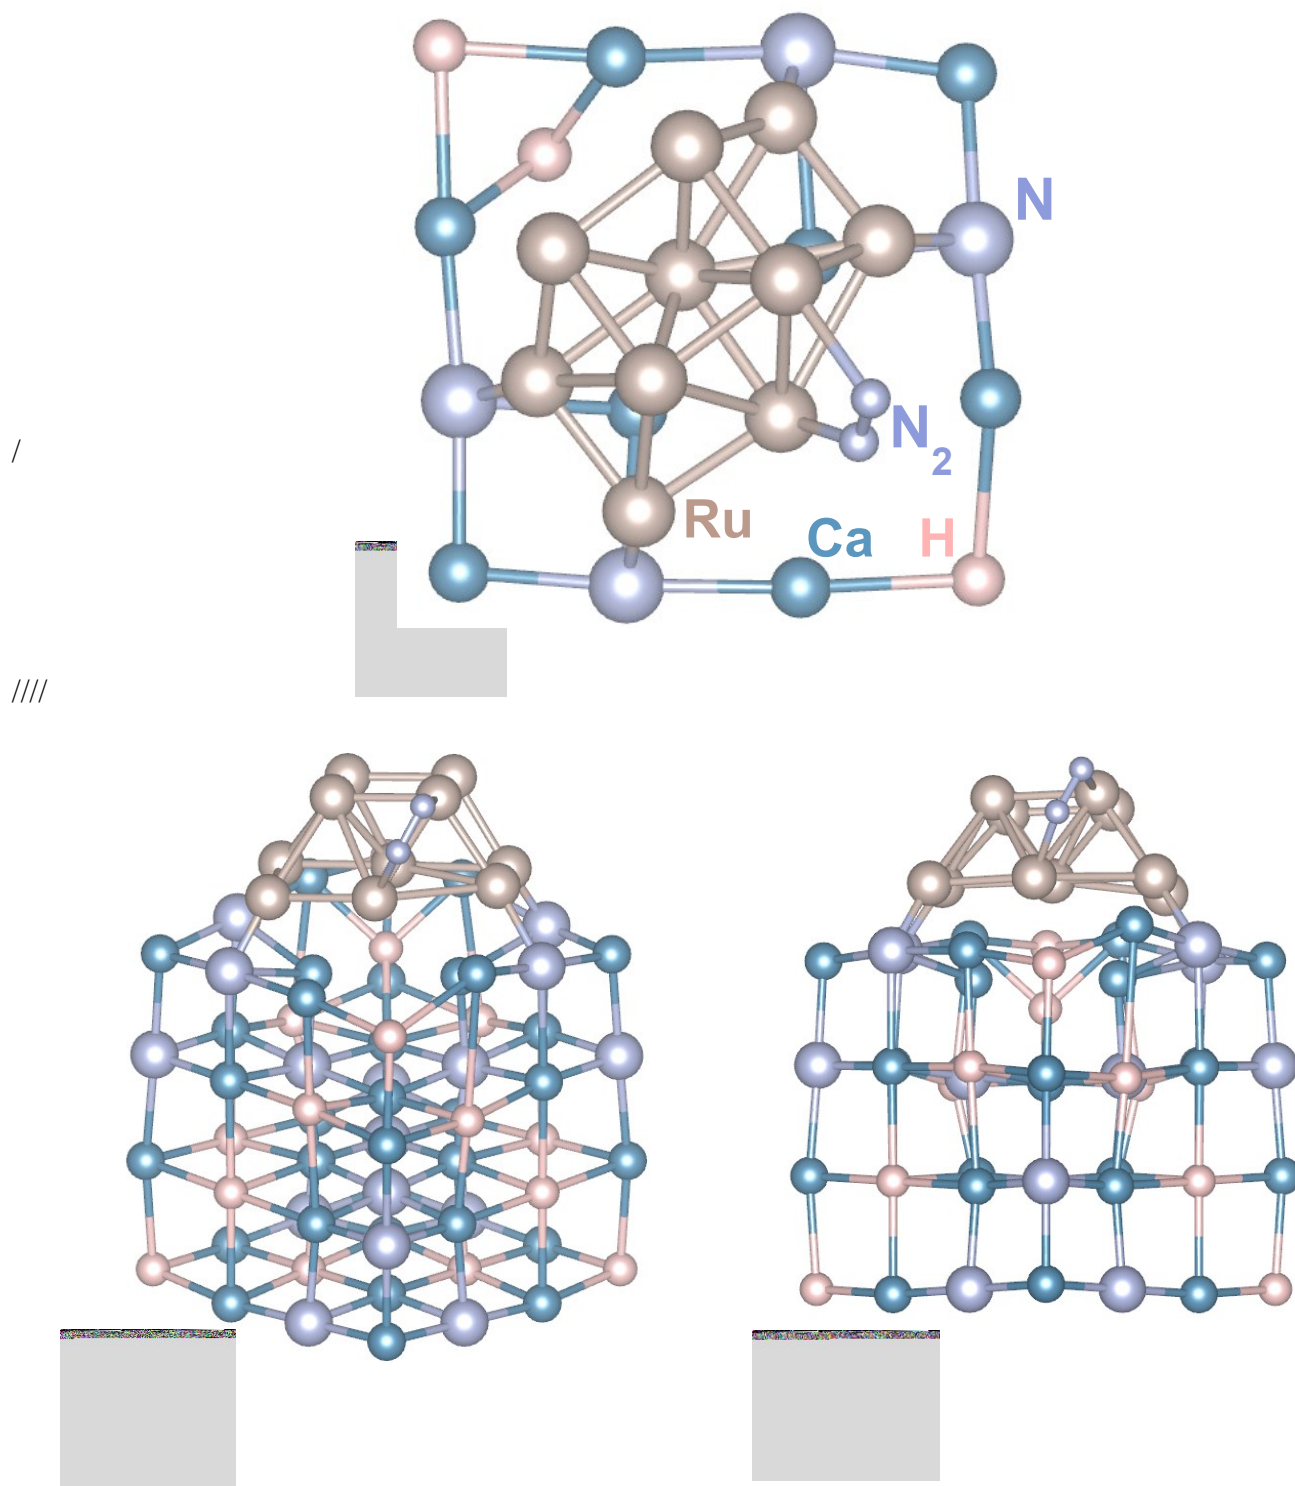

**Figure S16** Computational models for Ru<sub>10</sub>-loaded and N<sub>2</sub>-adsorbed Ca<sub>2</sub>NH<sub>1-x</sub>(100), Model 10 in Supplementary Table 4; top view (top) and side views (bottom two). The Ru<sub>10</sub> cluster, adsorbed N<sub>2</sub> molecule, and the topmost layer of Ca<sub>2</sub>NH<sub>1-x</sub> (100) are depicted in the top view. Note the normal vector the surface is defined as the c-vector in the drawing.

## References in Supplementary Information

- [S1] M. Kitano, et al., Electride support boosts nitrogen dissociation over ruthenium catalyst and shifts the bottleneck in ammonia synthesis, *Nat Commun.* 6, 6731, (2015).
- [S2] G. Kresse, J. Furthmüller, Efficiency of ab-initio total energy calculations for metals and semiconductors using a plane-wave basis set, *Comput. Mat. Sci.*, 6, 15-50 (1996).
- [S3] G. Kresse, J. Furthmüller, Efficient iterative schemes for ab initio total-energy calculations using a plane-wave basis set, *Phys. Rev. B*, 54, 11169-11186 (1996).
- [S4] P. E. Blöchl, Projector augmented-wave method, *Phys. Rev. B* 50, 17953-17979 (1994).
- [S5] G. Kresse, D. Joubert, From ultrasoft pseudopotentials to the projector augmented-wave method, *Phys. Rev. B* 59, 1758-1775 (1999).
- [S6] J. P. Perdew, K. Burke, M. Ernzerhof, Generalized Gradient Approximation Made Simple, *Phys. Rev. Lett.* 77, 3865-3868 (1996).
- [S7] H. J. Monkhorst, J. D. Pack, Special points for Brillouin-zone integrations, *Phys. Rev. B* 13, 5188-5192 (1976).
- [S8] K. Momma, F. Izumi, VESTA 3 for three-dimensional visualization of crystal, volumetric and morphology data, *J. Appl. Crystallogr.* 44, 1272-1276 (2011).
